# Supplementary material
Source: publisher figshare collection journal article supplement (https://acs.figshare.com/ndownloader/files/4569823)
Supplement: Supplementary file 1 [file 4569823]

## Supporting Information

### Surface residence and uptake of methyl chloride and methyl alcohol at the air/water interface studied by vibrational sum frequency spectroscopy and molecular dynamics

Kandice Harper, Babak Minofar,<sup>‡</sup> M. Roxana Sierra-Hernández, Nadia N. Casillas-Ituarte, Martina Roeselova,<sup>‡\*</sup> Heather C. Allen\*

\*Department of Chemistry, The Ohio State University, 100 West 18<sup>th</sup> Ave., Columbus, OH 43210 and

<sup>‡</sup>Institute of Organic Chemistry and Biochemistry, Academy of Sciences of the Czech Republic, Flemingovo nám. 2, 16610 Prague 6, Czech Republic.

#### SFG polarization studies

PPP and SPS polarization combination spectra were obtained and are shown in Figures S1 and S2, respectively.

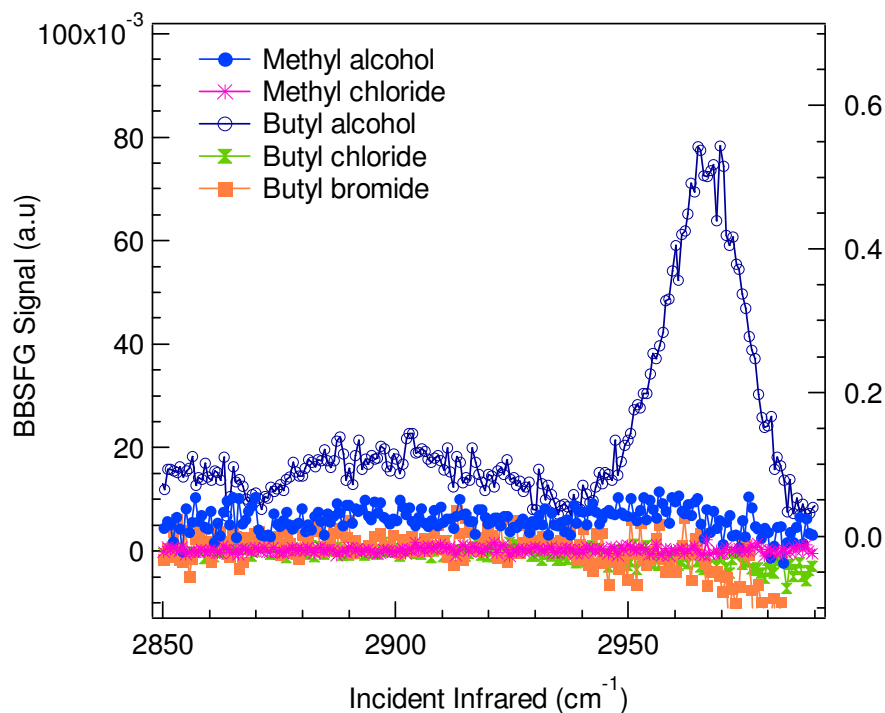

Figure S1. VSGF PPP spectra from flow experiments over water of methyl alcohol, methyl chloride, butyl alcohol, butyl chloride, and butyl bromide. The left axis is used for the butyl halides.

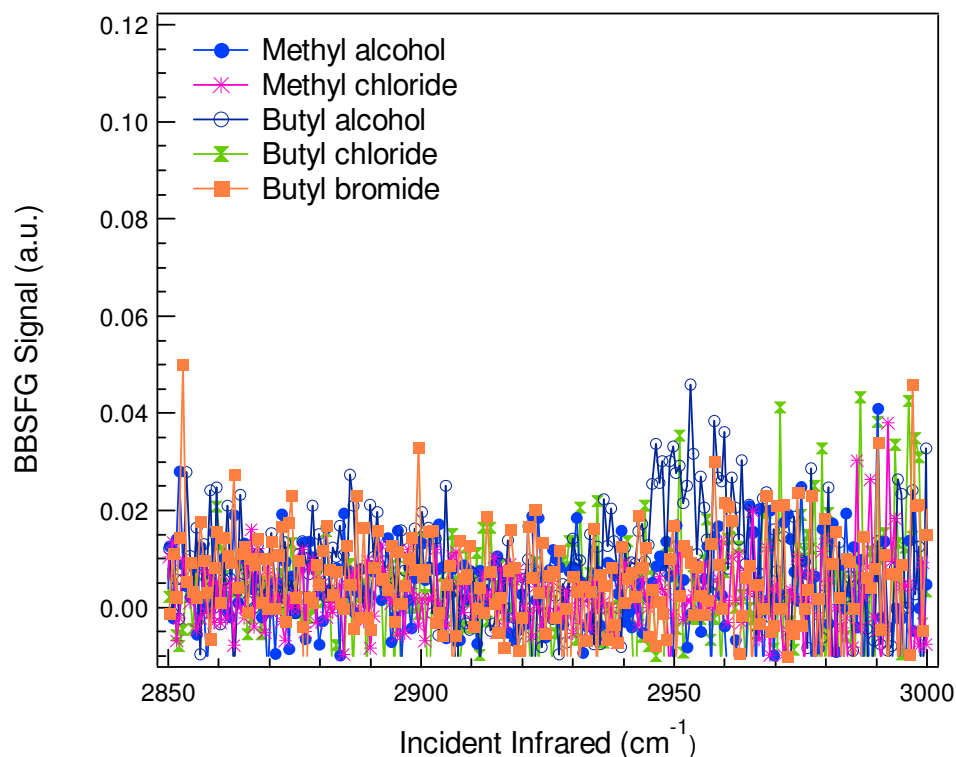

Figure S2. VSFG SPS spectra from flow experiments over water of methyl alcohol, methyl chloride, butyl alcohol, butyl chloride, and butyl bromide.

### Gas-phase Concentrations

The gas phase concentration of  $\text{CH}_3\text{OH}$  and  $\text{CH}_3\text{Cl}$  was determined by using a Thermo Nicolet FTIR spectrometer (Avatar 370, Thermo Electron Corporation). A mixture of  $\text{N}_2/\text{CH}_3\text{OH}$  was flowed at 15 standard cubic centimeters per minute (sccm) over 24 mL of water in a Petri dish contained in the flow chamber placed in the FTIR sample compartment, whereas  $\text{CH}_3\text{Cl}$  was flowed at 10 sccm. The flow conditions for each compound were kept the same as described for the surface analyses completed by the broad bandwidth sum frequency generation (BBSFG). Continuous IR spectra (50 scans,  $4\text{ cm}^{-1}$  resolution) were obtained for up to two hours. The concentration of  $\text{CH}_3\text{OH}$  was determined by using the absorbance of the  $\nu_{\text{CO-ss}}$  at  $1052\text{ cm}^{-1}$  and the cross section reported on HITRAN data base ( $1.388 \times$

$10^{-20} \text{ cm}^2/\text{molecule}$ ).<sup>1</sup> The concentration of  $\text{CH}_3\text{Cl}$  was estimated by using the absorbance of the  $\nu_{\text{CH}_3-\text{ss}}$  at  $2922 \text{ cm}^{-1}$ .<sup>1</sup> The  $\text{CH}_3\text{OH}$  and  $\text{CH}_3\text{Cl}$  concentrations are shown in Figure S3. The  $\text{CH}_3\text{OH}$  and  $\text{CH}_3\text{Cl}$  concentrations after two hours were determined to be  $4.16 \times 10^{17}$  and  $1.17 \times 10^{19}$  molecules/ $\text{cm}^3$ , respectively. These results show that  $\text{CH}_3\text{Cl}$  gas phase concentration was two orders of magnitude greater than that of  $\text{CH}_3\text{OH}$ , and therefore the gas phase concentration was not a limiting condition for the lack of SFG signal of  $\text{CH}_3\text{Cl}$ .

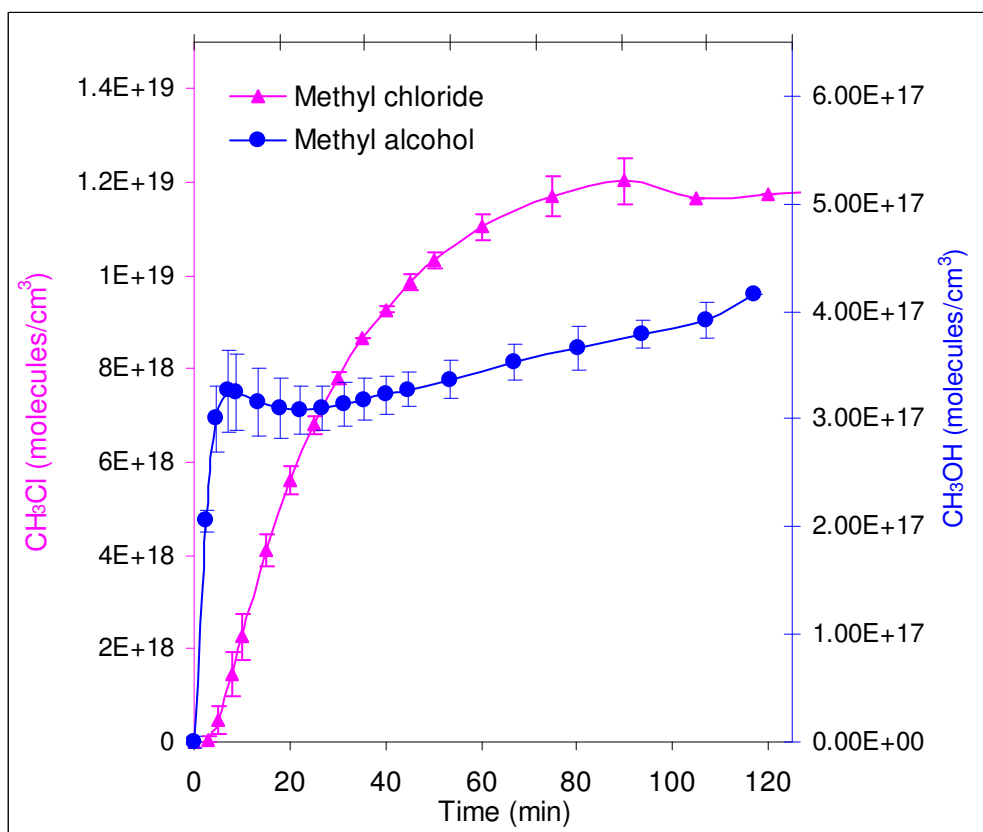

Figure S3. Gas phase concentration of  $\text{CH}_3\text{Cl}$  and  $\text{CH}_3\text{OH}$  over time.

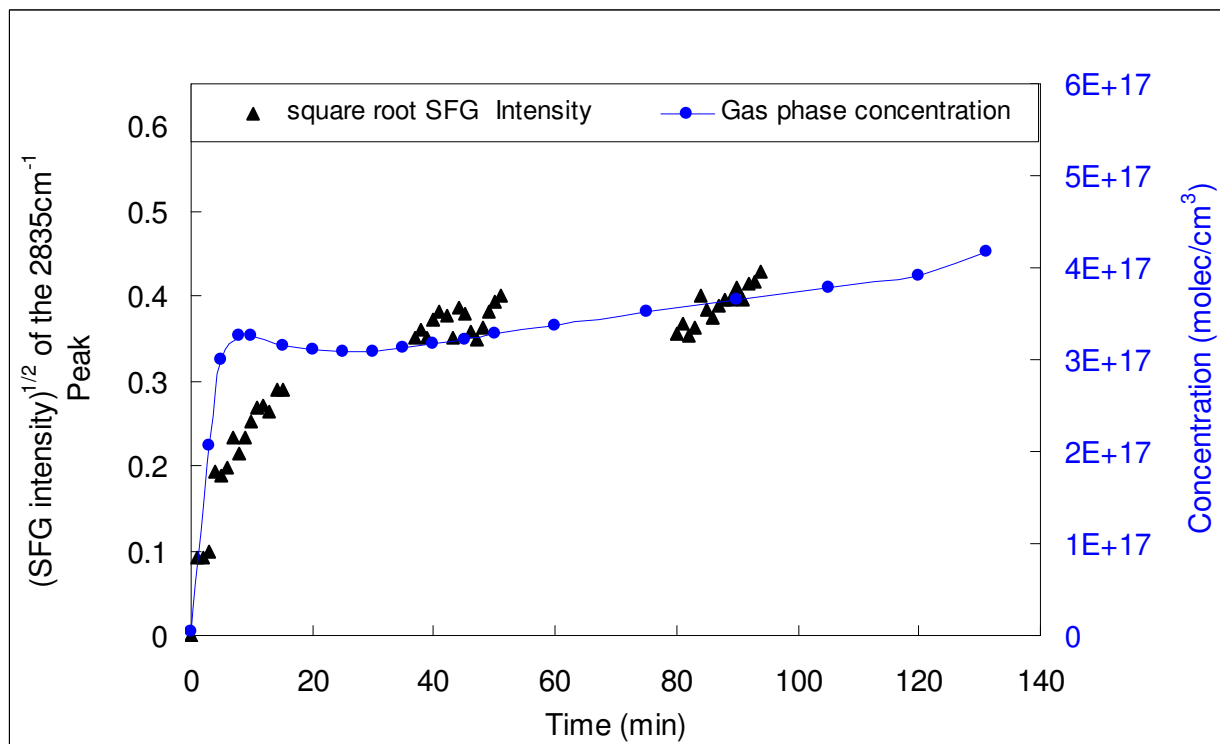

Figure S4. Gas phase concentration of CH<sub>3</sub>OH over time compared against the square root of the VSFG intensity (2835 cm<sup>-1</sup> peak).

## Bulk Concentrations

A CH<sub>3</sub>OH calibration curve was developed from FTIR spectra by integrating the peaks at 1052 cm<sup>-1</sup> to determine the bulk concentration in the flow experiments and is shown in Figure S5. The concentration of CH<sub>3</sub>OH in aqueous solution followed a linear trend for up to 2h. The solution concentrations of CH<sub>3</sub>OH were determined at 30, 60 and 120 minutes of flow from the calibration curve. Three concentrations are shown in Table S1.

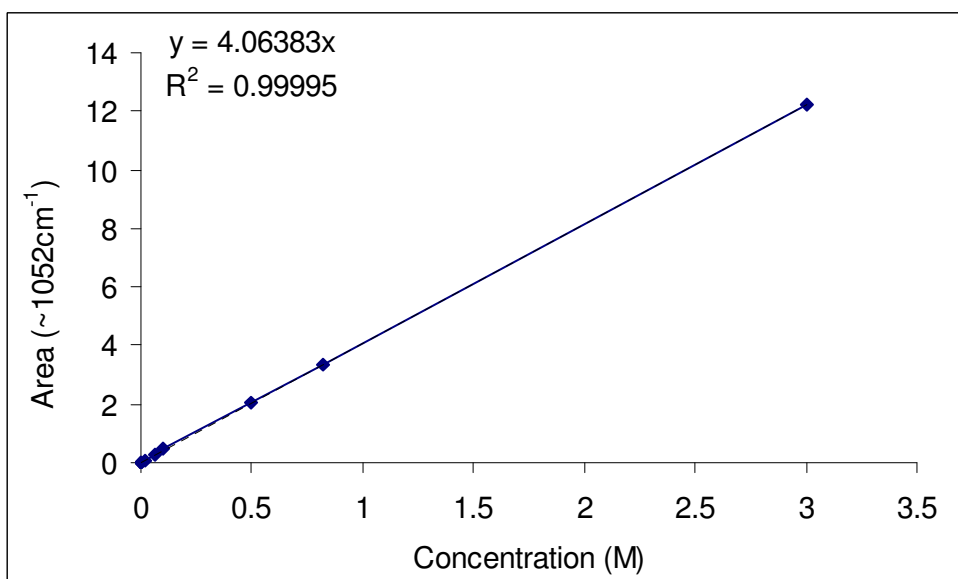

Figure S5. Calibration curve of bulk CH<sub>3</sub>OH.

Table S1. CH<sub>3</sub>OH bulk concentration of flow experiments.

| Time (min) | Concentration (M) | St. dev |
|------------|-------------------|---------|
| 30         | 0.110             | 0.007   |
| 60         | 0.19              | 0.016   |
| 120        | 0.45              | 0.014   |

For all CH<sub>3</sub>OH flow experiments, the glass vial containing the CH<sub>3</sub>OH was weighed before and after the flow. The weight difference was used to calculate the total number of molecules flowed into the chamber and is shown in Table S2 (second column). During the flow, molecules diffuse into the 24 mL of water (number calculated from the calibration curve, third column), while others stay in the gas phase (measured by FTIR, fourth column).

Table S2. Number of CH<sub>3</sub>OH molecules total (calculated by weight loss), in aqueous phase, and in gas phase.

| Time (min) | Total number of molecules | Molecules in 24 mL water | Molecules in gas phase |
|------------|---------------------------|--------------------------|------------------------|
| 30         | $2.06 \times 10^{21}$     | $1.71 \times 10^{21}$    | $3.10 \times 10^{17}$  |
| 60         | $5.21 \times 10^{21}$     | $3.01 \times 10^{21}$    | $3.37 \times 10^{17}$  |
| 120        | $9.12 \times 10^{21}$     | $6.43 \times 10^{21}$    | $3.92 \times 10^{17}$  |

The number of molecules in water added to the number of molecules in the gas phase after 30 min of flow was  $1.79 \times 10^{21}$  molecules/cm<sup>3</sup>, which is ~ 85% of the number of molecules calculated by weight loss. The summation of the number of molecules in the condensed and gas phase after 60 and 120 min of flow are  $3.10 \times 10^{21}$  and  $6.53 \times 10^{21}$  molecules/cm<sup>3</sup> respectively. These two values are ~ 60 % and 70% from those calculated by weight loss, suggesting that water surface is becoming saturated by CH<sub>3</sub>OH molecules.

### Evaluation of the infrared energy

The SFG intensity is proportional to the intensity of both the visible and infrared beams as shown in the equation below.

$$I^{\omega_{SFG}}(\omega) \propto \left| E^{\omega_{SFG}} \cdot \chi^{(2)} : E^{\omega_{VIS}} E^{\omega_{IR}} \right|^2 I^{\omega_{VIS}} I^{\omega_{IR}}$$

$I^{\omega_{SFG}}$ ,  $I^{\omega_{VIS}}$ , and  $I^{\omega_{IR}}$  are the intensities of the sum frequency, incident visible, and incident infrared beams, respectively. Therefore, if the infrared beam is completely absorbed by gas phase molecules before reaching the interface there will not be generation of the sum frequency photons. To verify that there were sufficient infrared photons after flowing alkyl halides, the infrared energy coming out of the chamber was measured. This set of experiments was performed on a scanning SFG (SSFG) system. Details of the SSFG system can be found in previous publications.<sup>2</sup> The infrared beam reflected from a gold mirror was monitored as the infrared beam was scanned from 2800 to 3100  $\text{cm}^{-1}$ . A scan of the empty chamber was acquired and is shown in Figure S6 (initial). There is a relative constant infrared energy of  $\sim 180 \mu\text{J}$  in this wavenumber range. Then a mixture of  $\text{N}_2$ /methyl alcohol ( $\text{CH}_3\text{OH}$ ) gases was allowed to enter the chamber with a flow rate of 15 sccm as described in the Experimental Section of the manuscript. After approximately an hour of flow the infrared energy was measured from 2800 to 3100  $\text{cm}^{-1}$  (Figure S6). The chamber was then evacuated with pure  $\text{N}_2$  until the initial infrared energy ( $\sim 180 \mu\text{J}$ ) was recovered. Then methyl chloride ( $\text{CH}_3\text{Cl}$ ) was flowed at 10 sccm into the chamber. The infrared energy after  $\sim 40$  min of flow was measured and is also shown in Figure S6. Several dips are observed in the  $\text{CH}_3\text{OH}$  and  $\text{CH}_3\text{Cl}$  spectra. These dips correspond to the absorbances (assigned to  $\text{CH}_3$  symmetric stretch and  $\text{CH}_3$  Fermi resonance) of the gas phase molecules of  $\text{CH}_3\text{OH}$  and  $\text{CH}_3\text{Cl}$ . Also, it was observed that the infrared energy after  $\text{CH}_3\text{OH}$  flow was always lower than that observed after  $\text{CH}_3\text{Cl}$  flow. From these results, it can be suggested that the infrared energy after  $\text{CH}_3\text{Cl}$  flow was sufficient to generate sum frequency signal. The same procedure was followed for the measurement of the infrared energies after the flow of butyl alcohol and butyl halides (data not shown). The flow conditions were kept the same as described for the surface analysis. In all cases, the resultant infrared energy of the alcohols was lower than that observed for the alkyl halides. This data was reproduced by infrared measurements from Fourier transform infrared (FTIR) spectroscopy using similar flow conditions as described below in the concentration measurements.

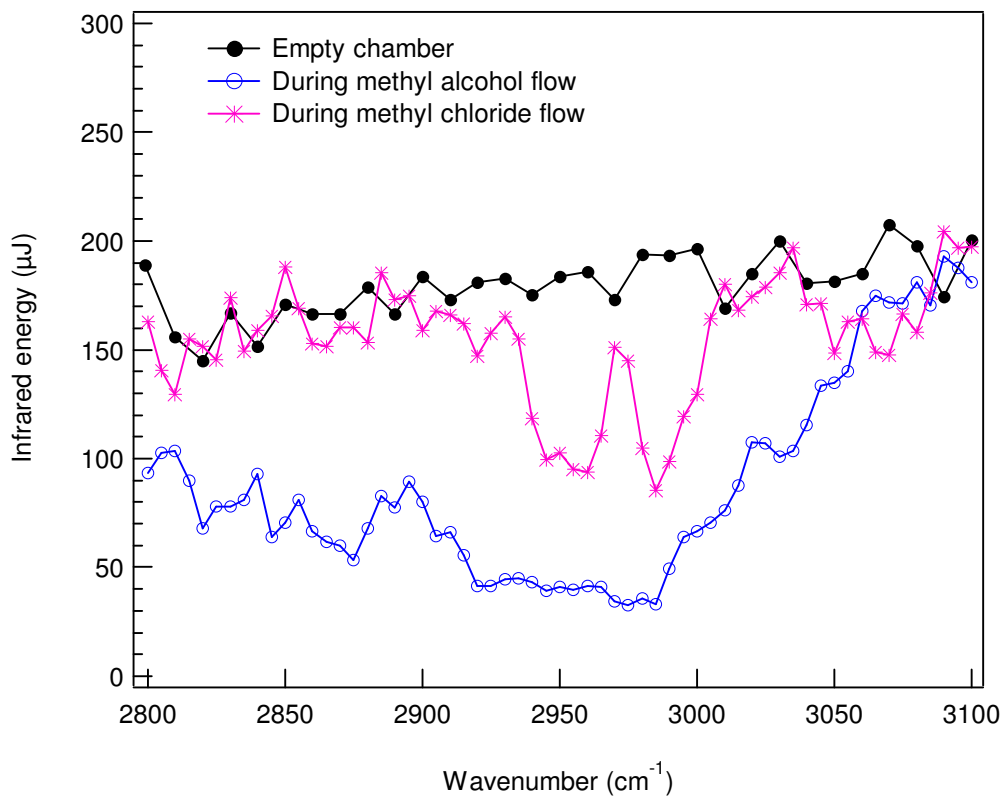

Figure S6. Infrared energy versus wavenumber at initial conditions (empty chamber) and during the flow of  $\text{CH}_3\text{OH}$  and  $\text{CH}_3\text{Cl}$ .

### Raman studies of the bulk solutions

Raman spectra of the aqueous solutions after the flow of the (a) methyl and (b) butyl species were obtained and are shown in Figure S7. Note: the spectral region between  $600$  to  $1100\text{ cm}^{-1}$  was also acquired to look for the C-Cl and C-Br stretches for the butyl species (spectra not shown), but no peaks were detected. Spectra show that methyl species and butyl alcohol are adsorbed into the bulk phase.

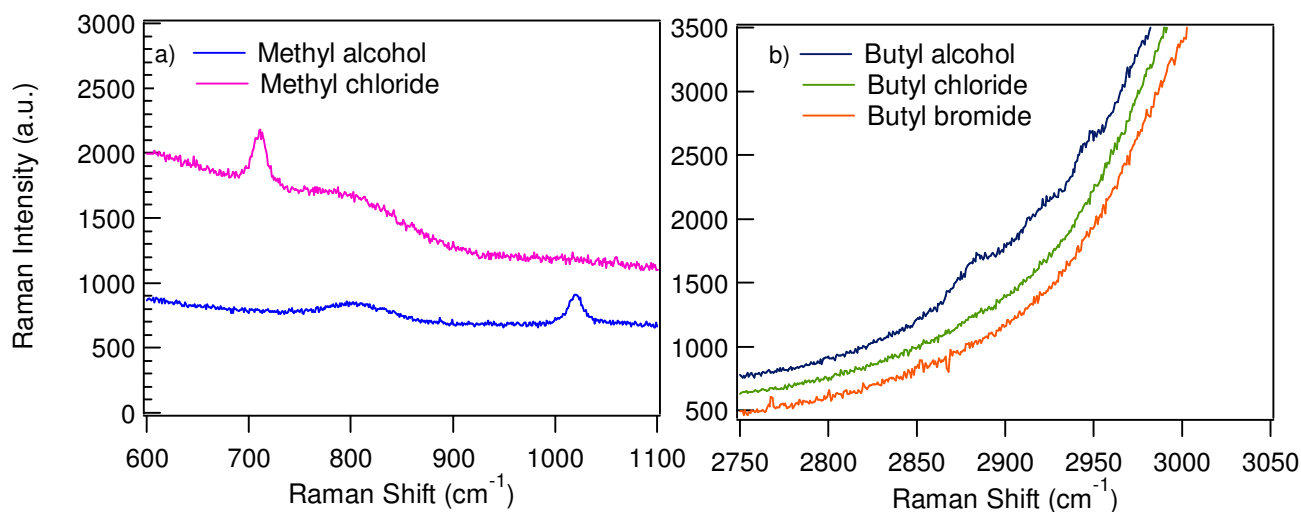

Figure S7. Raman spectra of the aqueous solutions after the flow of the (a) methyl and (b) butyl species.

## References

- (1) Rothman, L. S.; Jacquemart, D.; Barbe, A. C. B., D.; Birk, M.; Brown, M. R.; Carleerf, L. R.; Chackerian Jr, C.; Chance, K.; Coudert, L. H.; Dana, V.; Devi, V. M.; Flaud, J.-M.; Gamache, R. R.; Goldman, A.; Hartmann, J.-M.; Jucks, K. W.; Maki, A. G.; Mandin, J.-Y.; Massie, S. T.; Orphal, J.; Perrin, A.; Rinsland, C. P.; Smith, M. A. H.; Tennyson, J.; Tolchenov, R. N.; Toth, R. A.; Vander Auwera, J.; Varanasiq, P.; Wagner, G. *Journal of Quantitative Spectroscopy & Radiative Transfer* **2005**, 96, 139-204.
- (2) Liu, D.; Ma, G.; Xu, M.; Allen, H. C. *Environ. Sci. Technol.* **2005**, 39, 206-212.
